# Supplementary material for: Diet and SIRT1 Genotype Interact to Modulate Aging-Related Processes in Patients with Coronary Heart Disease: From the CORDIOPREV Study
Source: MDPI journal article supplement (doi:10.3390/nu14183789), 2022-09-14
Supplement: s1 [file s1]

**Table S1.** Characteristics of patients included in the study according the genotype for the SIRT1 polymorphism rs7069102.

|                           | rs7069102    |              | p     |
|---------------------------|--------------|--------------|-------|
|                           | GG           | CG+CC        |       |
| N                         | 351          | 365          |       |
| Men/women (n)             | 298/53       | 296/69       | 0.176 |
| Age (years)               | 59 ± 8.8     | 59.7 ± 8.7   | 0.316 |
| Weight (kg)               | 86 ± 13.6    | 84.1 ± 13.2  | 0.052 |
| Waist circumference (cm)  | 104.9 ± 11   | 104.5 ± 10.6 | 0.649 |
| BMI (kg/m <sup>2</sup> )  | 31.3 ± 4.4   | 30.8 ± 4.3   | 0.144 |
| Total cholesterol (mg/dL) | 157.9 ± 31.6 | 159.9 ± 30   | 0.389 |
| HDL-C (mg/dL)             | 42.1 ± 10.2  | 42.5 ± 10.2  | 0.652 |
| LDL-C (mg/dL)             | 87.6 ± 25.4  | 89.9 ± 24.5  | 0.220 |
| TG (mg/dL)                | 132.9 ± 68.1 | 135.8 ± 69.1 | 0.573 |
| Glucose (mg/dL)           | 112.3 ± 36.2 | 112.4 ± 37.2 | 0.995 |
| CRP (mg/dL)               | 3.1 ± 4      | 2.8 ± 3.1    | 0.229 |

Values expressed as mean ± SEM. BMI, Body mass index; HDL-C, high density lipoprotein; LDL-C, low density lipoprotein; TG, triglycerides; CRP, C-reactive protein. Variables were calculated using One-Way ANOVA analysis.
